# Supplementary material for: A Highly Efficient Human Pluripotent Stem Cell Microglia Model Displays a Neuronal-Co-culture-Specific Expression Profile and Inflammatory Response
Source: PubMed Central journal article supplement (PMC5470330; doi:10.1016/j.stemcr.2017.05.017), 2017-06-09
Supplement: mmc1.pdf [file mmc1.pdf]

**Stem Cell Reports, Volume 8**

**Supplemental Information**

**A Highly Efficient Human Pluripotent Stem Cell Microglia Model Displays a Neuronal-Co-culture-Specific Expression Profile and Inflammatory Response**

**Walther Haenseler, Stephen N. Sansom, Julian Buchrieser, Sarah E. Newey, Craig S. Moore, Francesca J. Nicholls, Satyan Chintawar, Christian Schnell, Jack P. Antel, Nicholas D. Allen, M. Zameel Cader, Richard Wade-Martins, William S. James, and Sally A. Cowley**

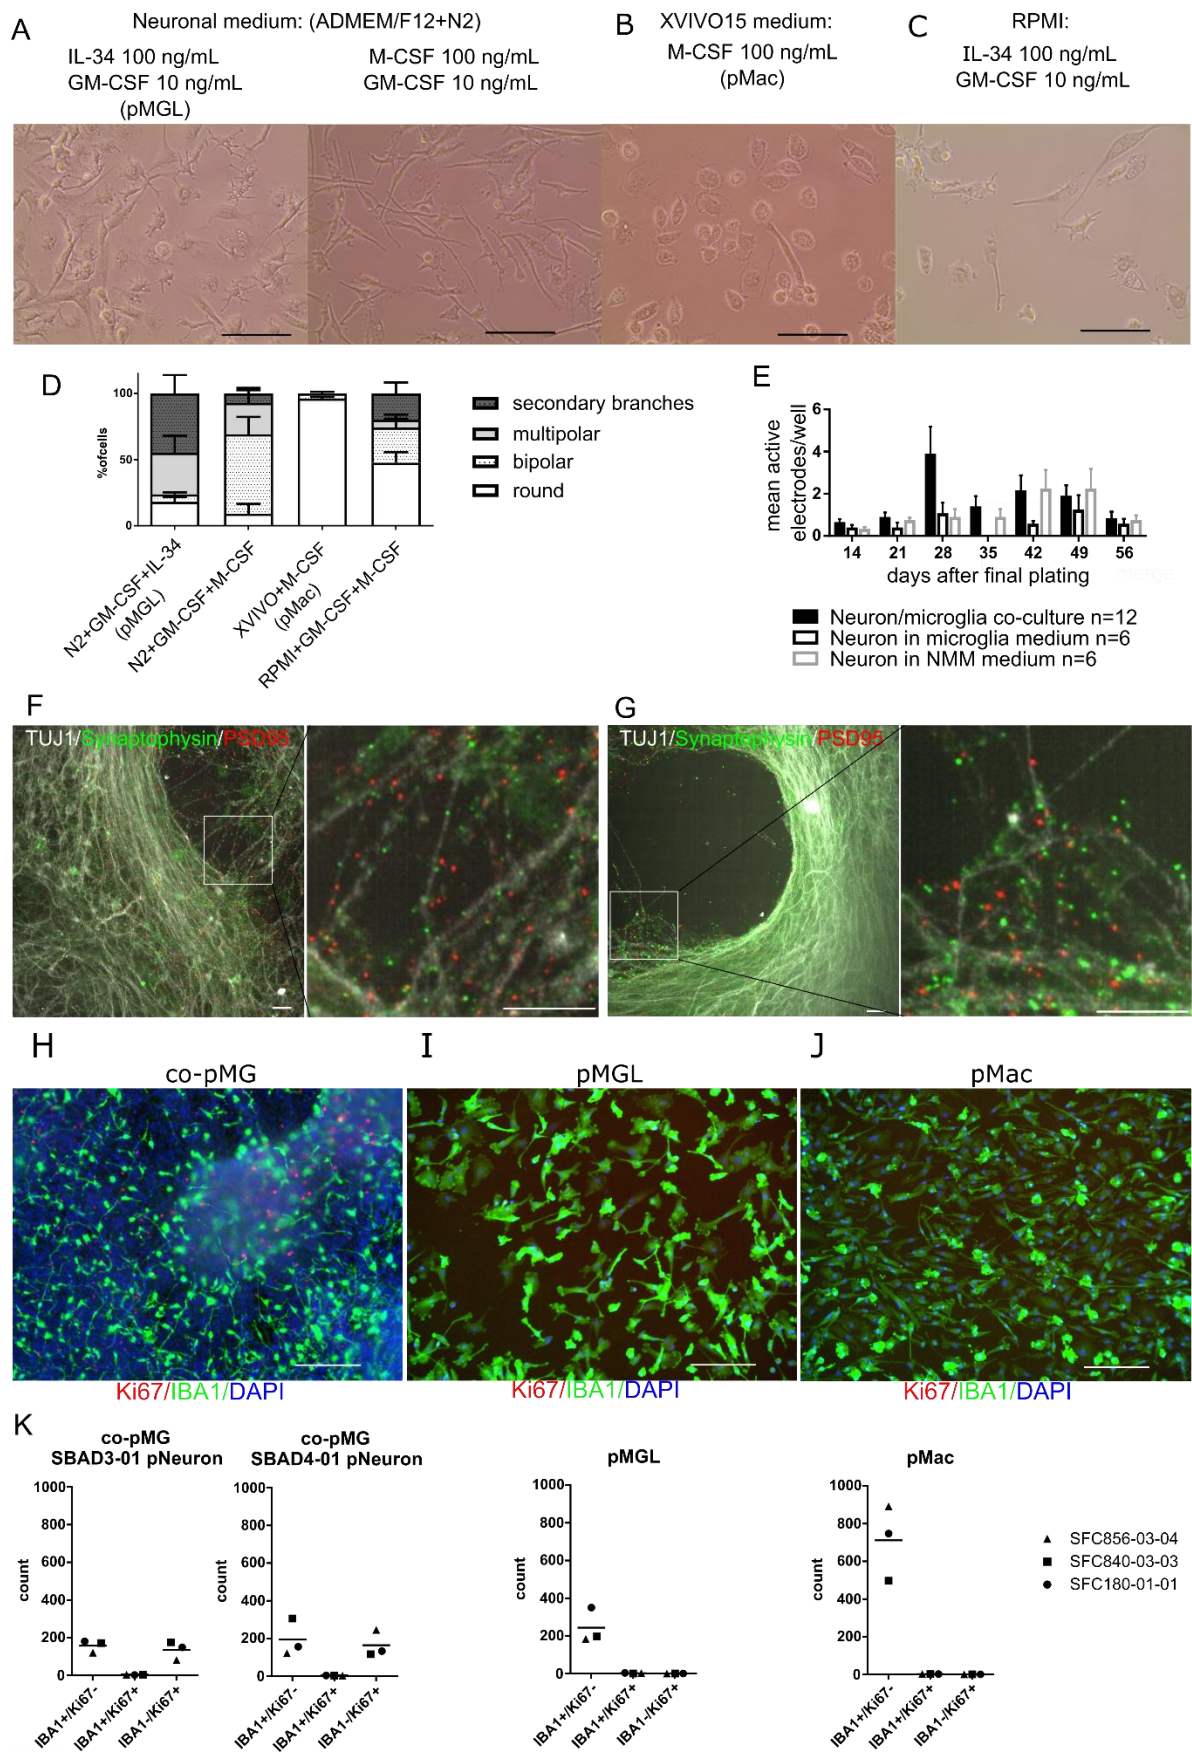

Figure S1 Further characterisation of macrophage and microglia cultures

(A-D) Identification of basal media and growth factors that promote ramified microglial morphology. pMacpre were differentiated for 17 days with different basal media and growth factors, as indicated. (A) Neuronal medium. (B) Our standard iPSC-macrophage medium (van Wilgenburg et al., 2013). (C) Medium described previously to promote microglia-like morphology in blood monocytes (Etemad et al., 2012). Representative phase contrast images of each condition show that ADMEM/F12 + N2 + 100 ng/mL IL-34 + 10 ng/mL GM-CSF promotes the most ramified microglia-like morphology. Scale bar 50  $\mu$ m. (D) Quantification of morphology. Secondary branching was considered indicative of a ramified microglia-like morphology. Mean of 3 images per condition, error bars represent SEM. (E-G) Neuronal electrical functionality and synaptic markers in co-cultures. (E) Spontaneous electrical activity of cultures detected using a multi-electrode array (12 electrodes per well, n = number of wells, error bars represent SD). Neurons show spontaneous electrical activity from the beginning of co-culture, which increases modestly over an extended time period. Electrical activity is not inhibited by the presence of co-pMG. Note that electrical activity can only be detected from neurons that are in contact with the electrodes, and since the neurons form clumps, especially at longer culture times, not all replicate wells record activity. (F, G) The presynaptic marker Synaptophysin and the postsynaptic marker PSD95 can be detected in co-cultures (F) and neuron monoculture (G) (images taken at day 15 of co-culture, scalebar 20  $\mu$ m). See also Video S1, showing calcium flux upon K<sup>+</sup> stimulation. (H-K) Continued Proliferation of iPSC-neuronal progenitors but rarely of microglia or macrophages. (H-J) Cultures were stained for the proliferation marker Ki-67 (Red) and IBA1 (macrophages/microglia, green) after 3 weeks. (H) Co-culture of SFC840-03-01 microglia with SBAD3-01 neurons. (I) SFC840-03-03 macrophages cultured in microglia medium. (J) SFC840-03-03 macrophages cultured in macrophage medium. Scale bar 100  $\mu$ m. (K) Quantification of IBA1 and Ki67 signal in microglia/macrophages of 3 iPSC lines in co-culture with 2 different pNeurons (SBAD3-01, SBAD4-01) or in monoculture. In neuronal clusters the DAPI signal was too dense for quantification of the number of neurons, but is expected to be >3000 neurons/image.

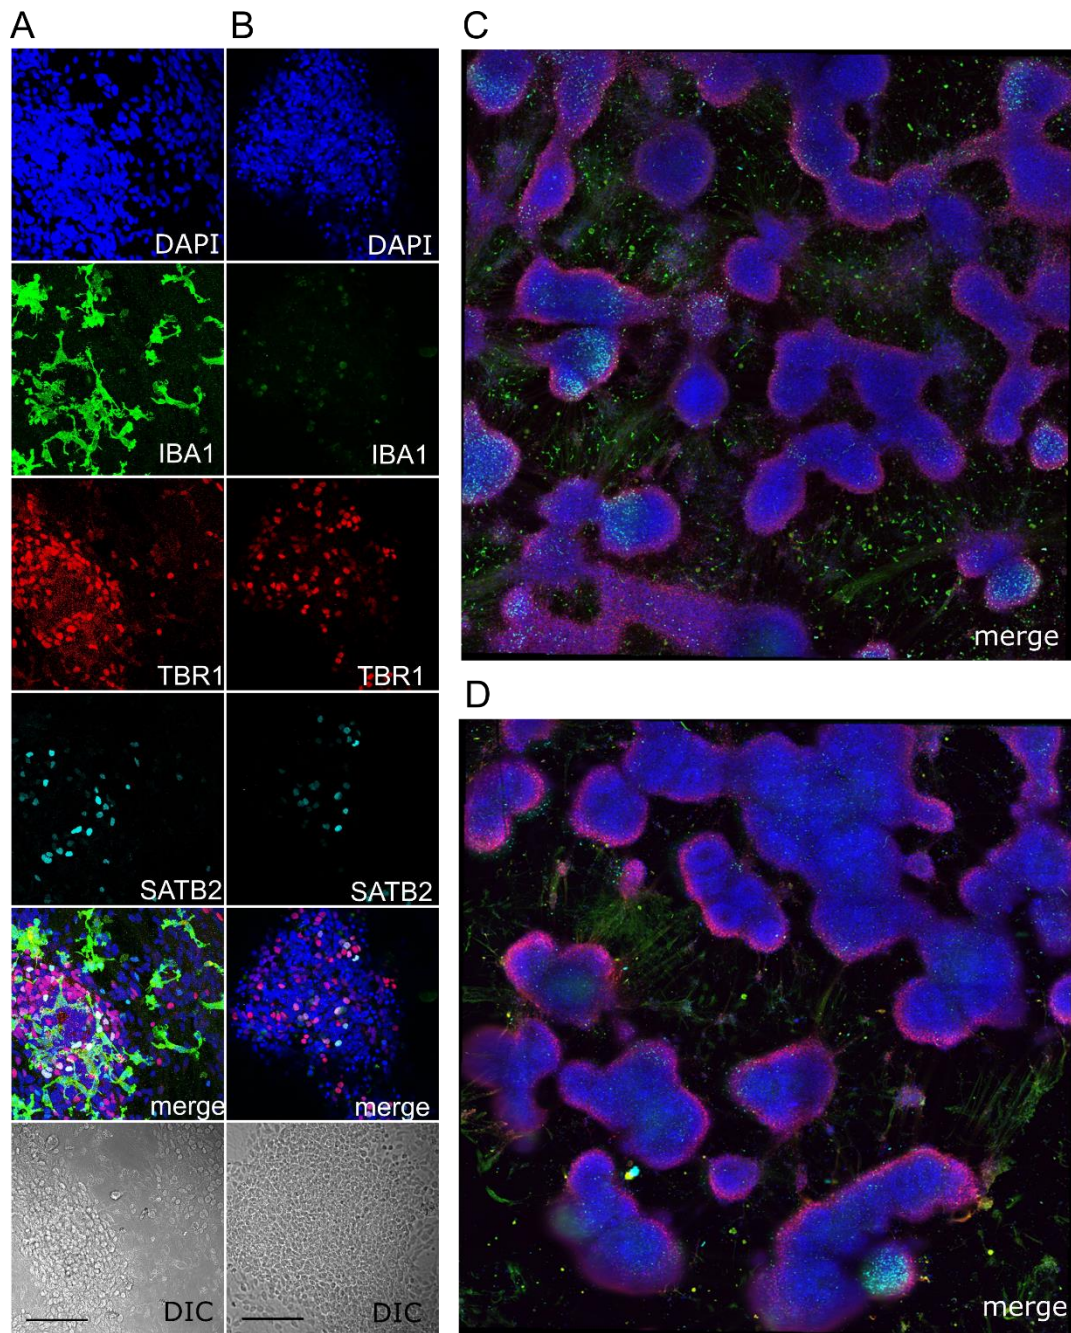

Figure S2 iPSC-microglia-neuronal co-cultures express deep layer (TBR1) and upper layer (SATB2) cortical markers and are stable for extended periods of co-culture (Relates to Figure 1)

(A) 14 day co-culture. (B) 14 day neuron-only culture. (C) 39 day co-culture (IBA1, SATB2, TBR1, DAPI). (D) 39 day neuron-only culture. Scale bar 50 μm.

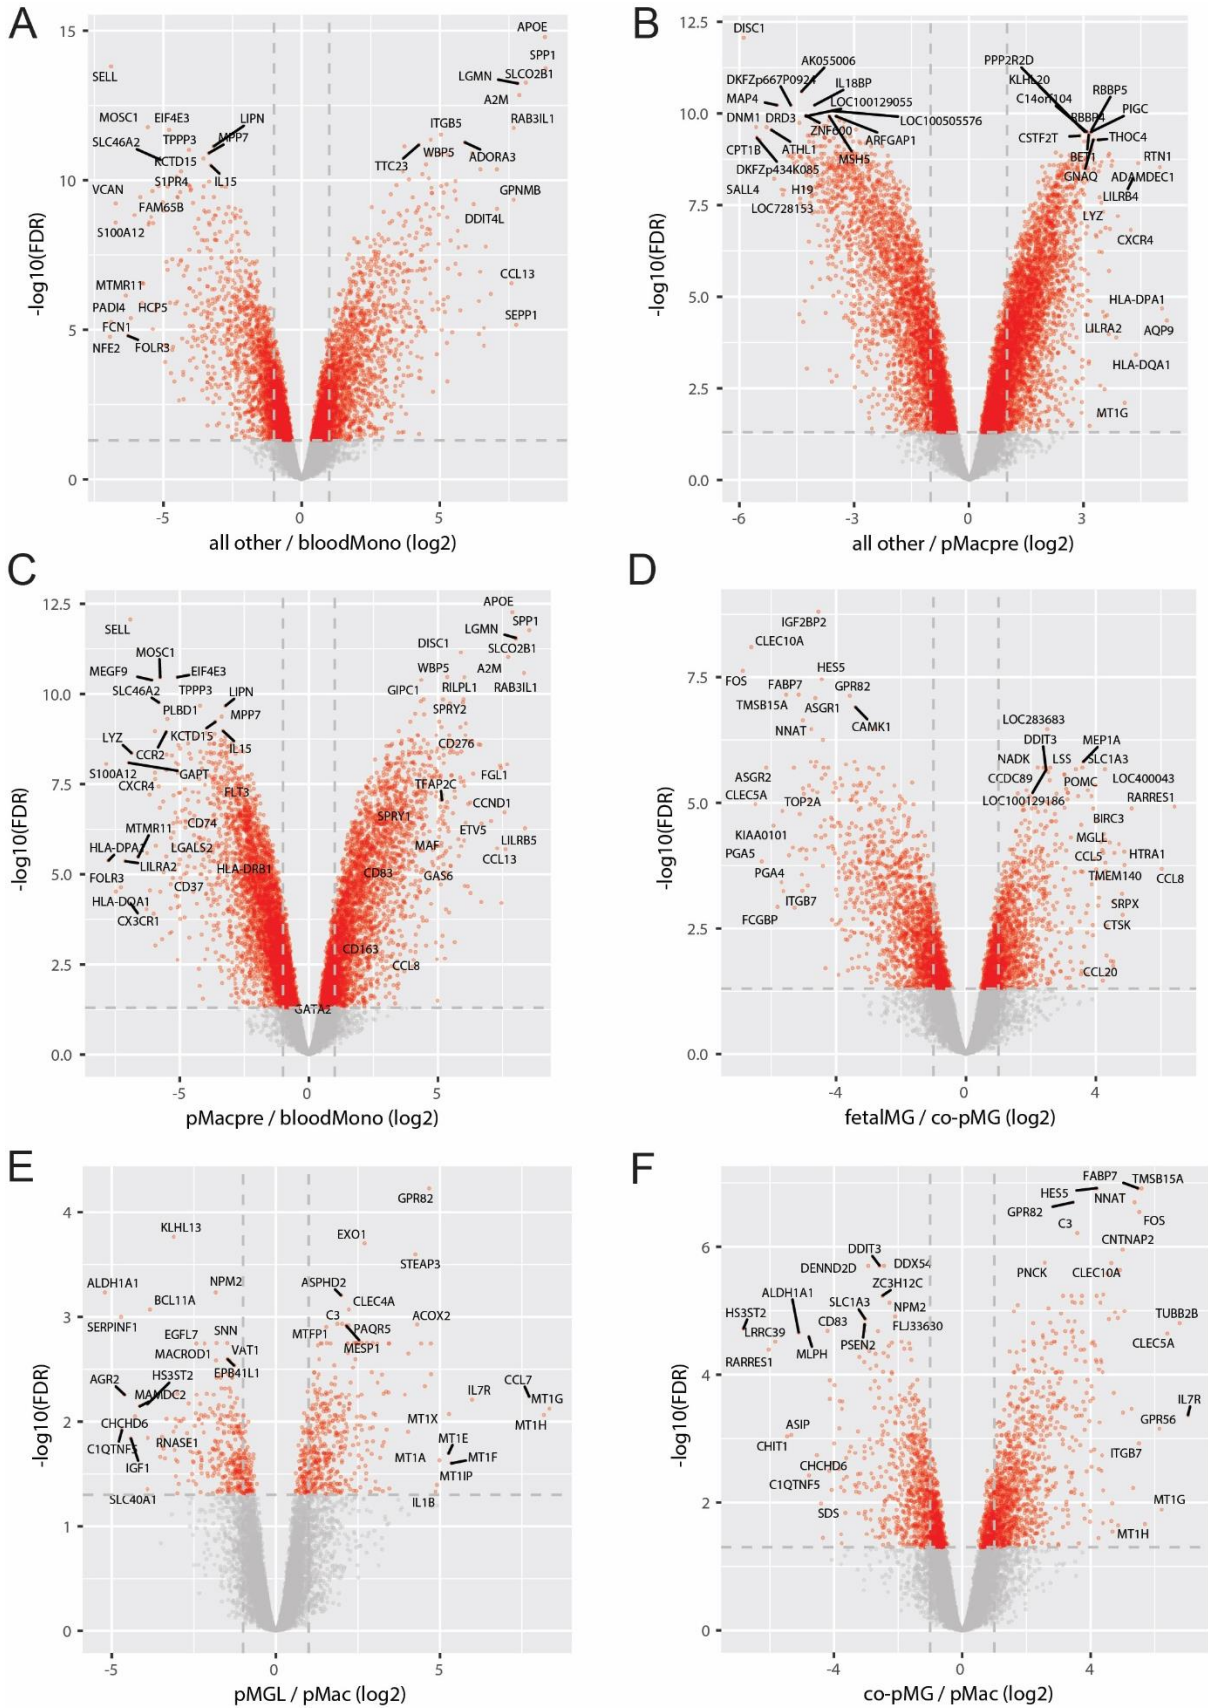

Supplementary Figure S3 Differential expression analyses (Relates to Figure 2)

Volcano plots show genes differentially expressed between (A) bloodMono vs all other samples (to explore PC2 in Figure 2A); (B) pMacpre vs all other samples (to explore PC1 in Figure 2A); (C-F) other comparisons of interest

as indicated. Horizontal dashed lines indicate an adjusted p- value of 0.05. Vertical dashed lines indicate a two-fold difference in expression.

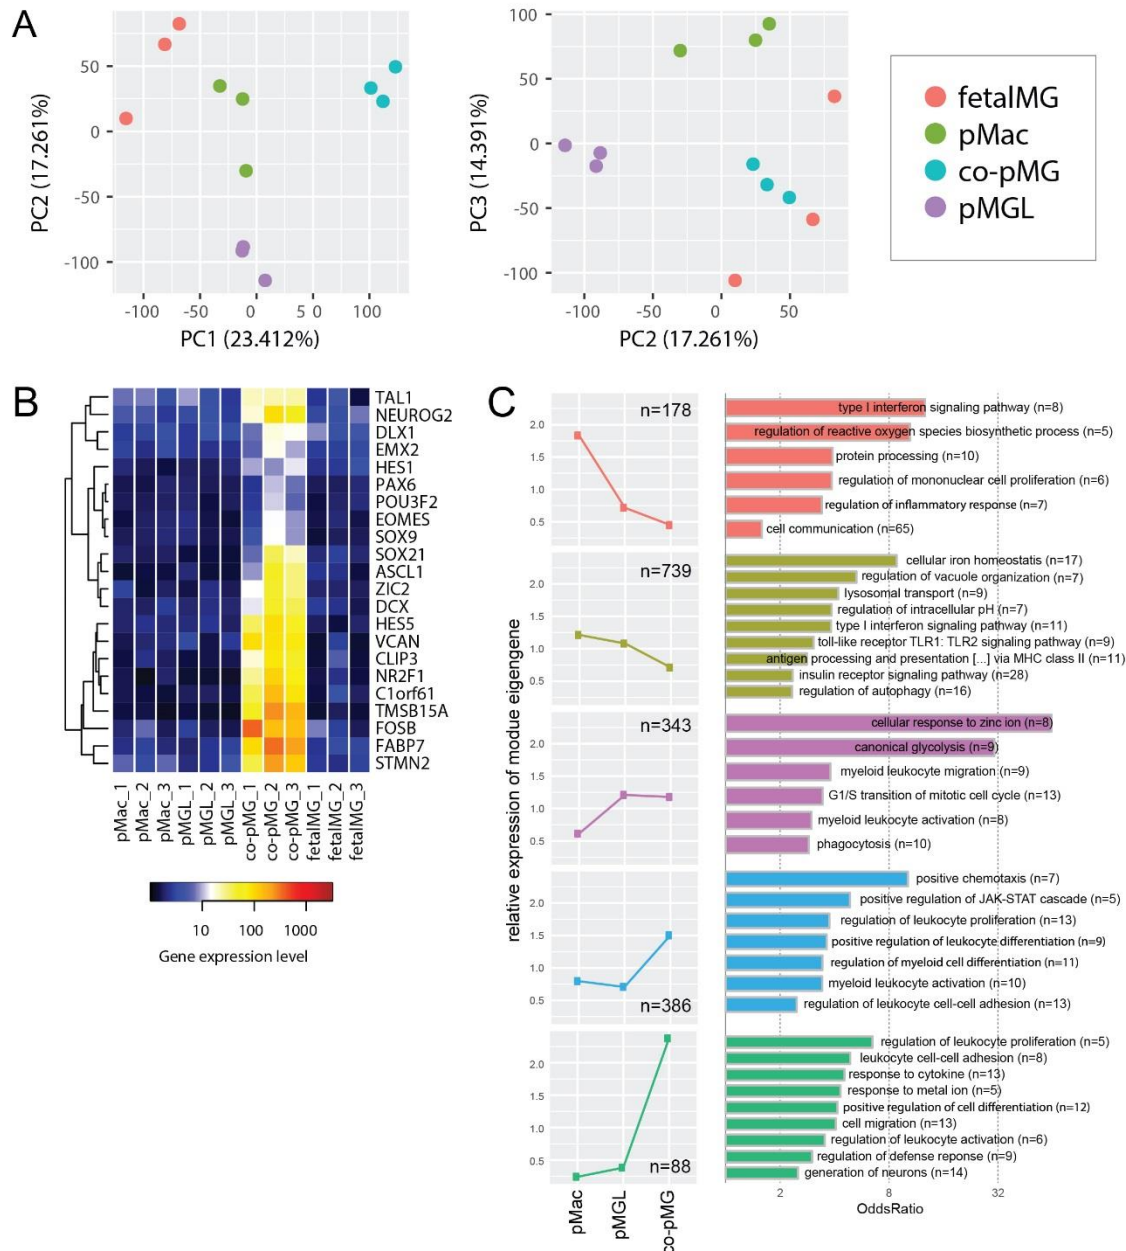

Supplementary Figure S4 Transcriptomics analysis of macrophage populations (Relates to Figure 2)

(A) PCA analysis of gene expression. Inspection of the proportion of variance scree plot identified three important components (data not shown). GO analysis revealed genes positively loading the first principle component (PC1, 23.4% of variance) to contain annotation categories associated with neural cells (data not shown). This signature is associated with co-pMG which, given their close association with neural cells whilst in co-culture, likely reflects a low level of neural cell derived contamination. Reassuringly, sample projection based on PC2 and PC3 (together explaining 31.7% of variance, right panel) demonstrated the similarity of the co-pMG and fetalIMG samples. (B) The heatmap shows examples of neural genes that positively contribute to PC1 (A). (C) Neuronal co-culture induces a microglia-like differentiation signature in iPSC derived cells. The figure shows k-means cluster profiles (left, line plots) and associated enriched biological processes (selected GO categories, adjusted p-value < 0.05) (right, bar graphs). Weakly detected genes were excluded from the analysis to limit the impact of transcripts deriving from the apparent low-level neural cell derived contamination of the co-pMG sample. Genes with significantly variable expression (adjusted p < 0.05) between pMac, pMGL and co-pMG were used as the input for the kmeans clustering. Salmon red panel shows pathways strongly downregulated in co-pMG versus iMac,

green panel shows pathways strongly upregulated in co-pMG versus pMac, the intermediate panels show pathways moderately up- (blue, purple) or downregulated (green-grey) in co- pMG. In the line graph panels n = number of microarray probes, in the bar graph panels n = number of genes. Further details of the analyses are given in the Supplementary Experimental Procedures.

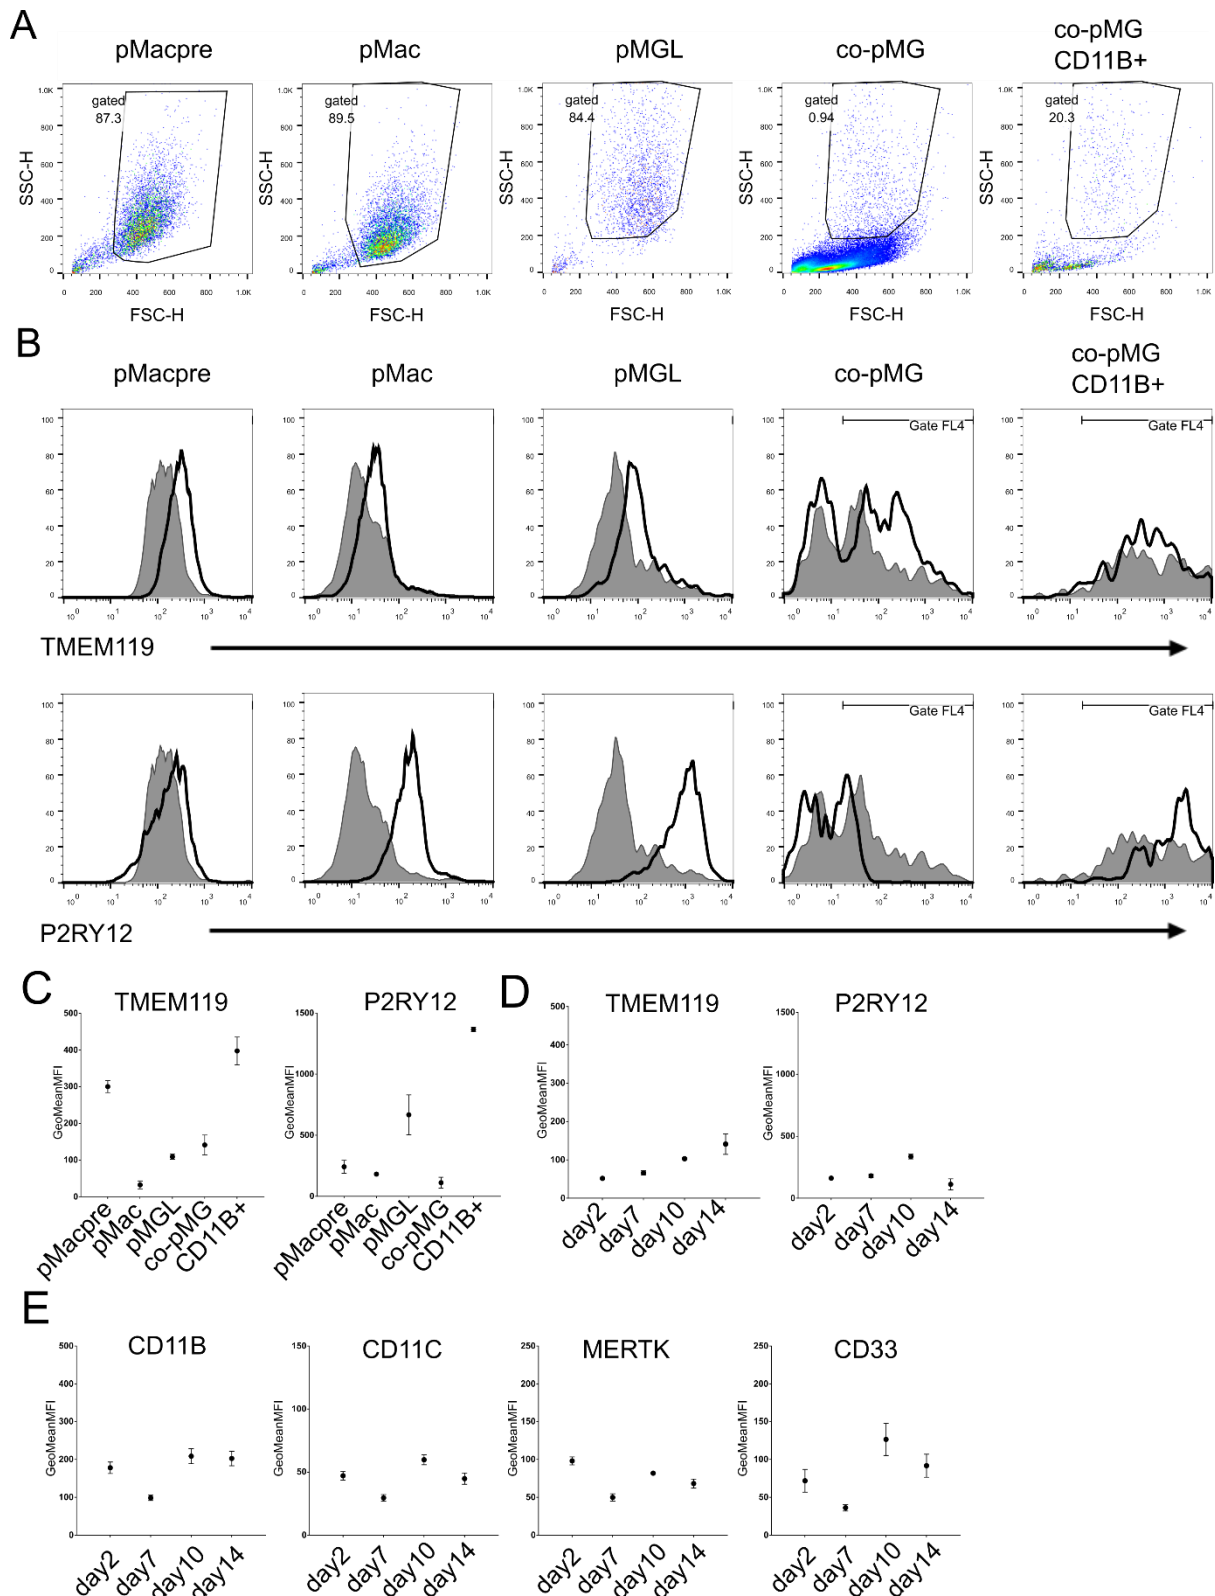

Figure S5 Additional flow cytometry (Relates to Figure 4)

(A) Forward Scatter FSC/Side Scatter SSC gating for Figure 4 and Figure S6. (B) FACS plots of microglia marker (black line) and 2<sup>nd</sup> antibody-only staining (grey) for SFC856-03-04 shows staining for TMEM119 and P2RY12 in monoculture but in co-culture non-specific background staining for 2<sup>nd</sup> antibody-only is apparent. (C) Mean Fluorescence Intensity of microglia markers (mean and SEM of 3 genetic backgrounds) in the different macrophage populations (D, E) Time-course of co-culture for microglia and monocyte/macrophage markers.

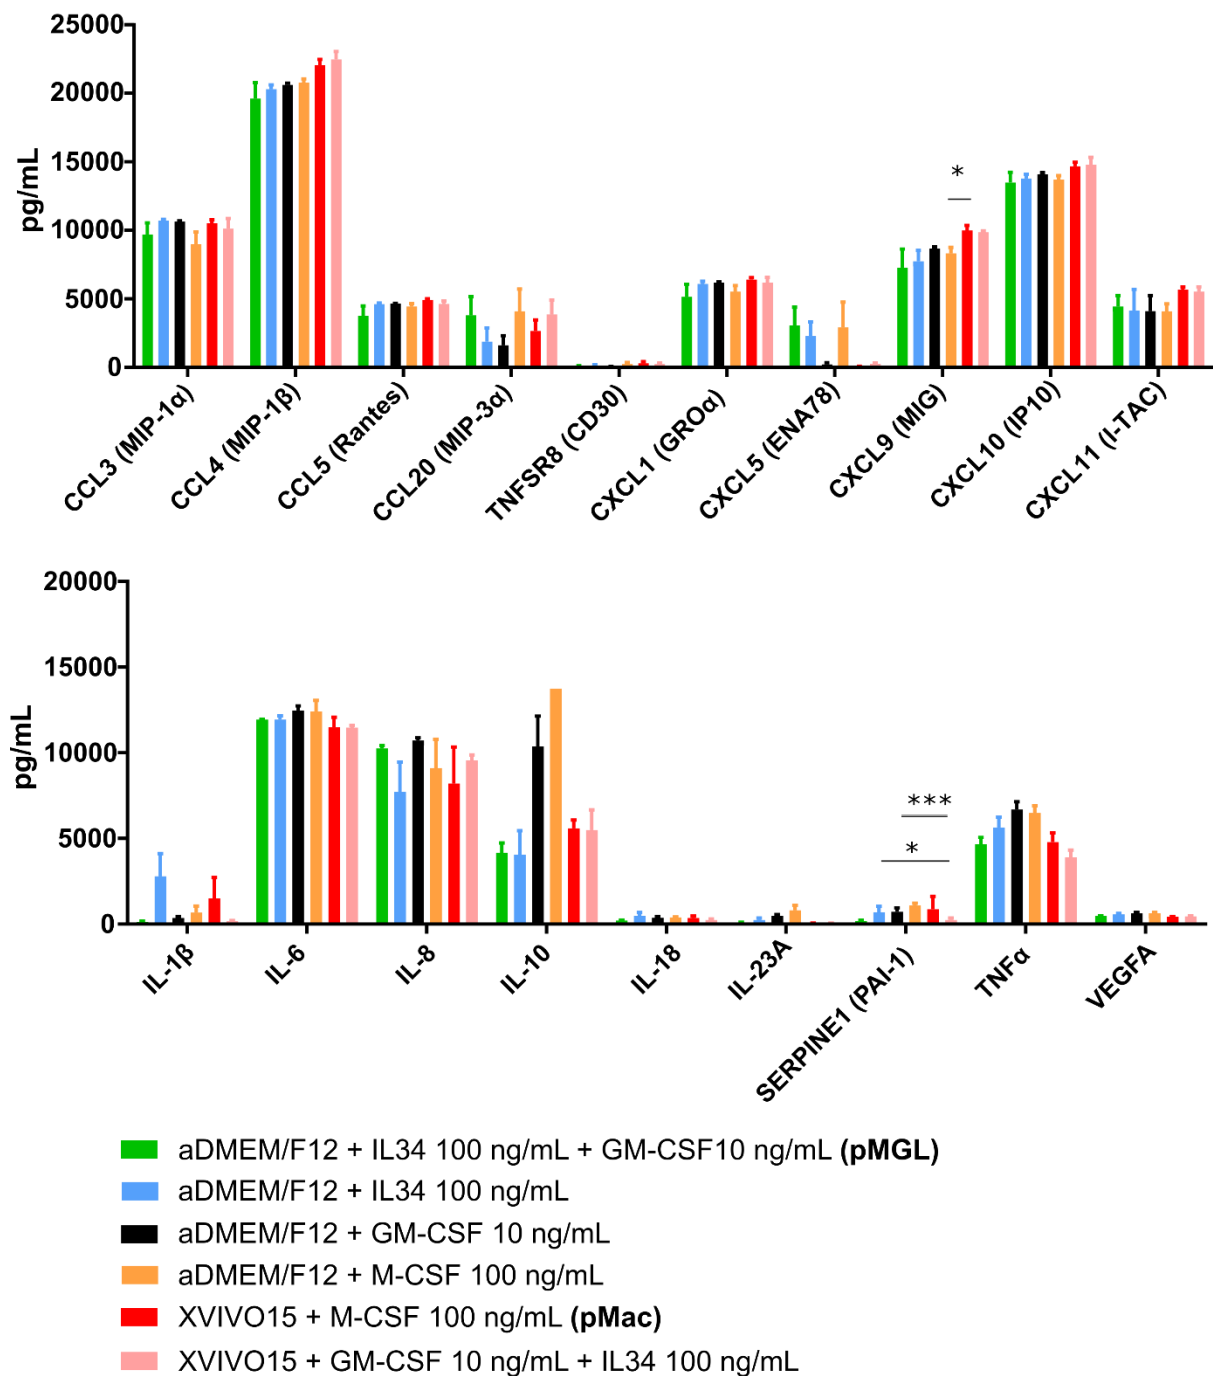

Figure S6 Effect of basal medium and cytokines on the inflammatory response to LPS/IFN $\gamma$  (Relates to Figure 7)

Luminex multiplex array. Mean  $\pm$  SEM of 3 biological replicates. Statistical analysis was performed with one way ANOVA followed by Tukey's multiple comparison test.



Table S1: Details of cells and materials used in this study

| <b>iPSC lines used in this study (All from disease-free donors)</b>                                                             |                                    |            |                                |                        |                          |
|---------------------------------------------------------------------------------------------------------------------------------|------------------------------------|------------|--------------------------------|------------------------|--------------------------|
| ID of fibroblast                                                                                                                | ID of iPSC clone                   | Gender     | Age of Biopsy (years)          | Reprogramming method   | iPSC clone characterised |
| SF180                                                                                                                           | SFC180-01-01                       | female     | 60                             | Cytotune1              | Haenseler in submission  |
| SF840                                                                                                                           | SFC840-03-01                       | female     | 67                             | Cytotune1              | (Fernandes et al., 2016) |
|                                                                                                                                 | SFC840-03-03                       |            |                                |                        |                          |
| SF856                                                                                                                           | SFC856-03-04                       | female     | 78                             | Cytotune1              | Haenseler in submission  |
| SBAD3                                                                                                                           | SBAD3-01                           | female     | 36                             | Cytotune1              | Melguzo in submission    |
| SBAD4                                                                                                                           | SBAD4-01                           | male       | 80                             | Cytotune1              | Melguzo in submission    |
| AH016                                                                                                                           | AH016-3                            | male       | 80                             | rv SO <sup>3</sup> KMN | (Sandor et al., 2017)    |
|                                                                                                                                 | AH016-3 Lenti_RFP_IP (11 copy)     |            |                                |                        | This study               |
| <b>Microglia medium (for pMGL, co-pMG and pNeuron)</b>                                                                          |                                    |            |                                |                        |                          |
|                                                                                                                                 | Final conc                         | Stock conc | Supplier                       | Cat no.                |                          |
| Advanced DMEM/F12                                                                                                               | 1x                                 | 1x         | Life Technologies              | 12634-010              |                          |
| N2 supplement                                                                                                                   | 1x                                 | 100x       | Life Technologies              | 17502-048              |                          |
| GlutaMAX™                                                                                                                       | 2mM                                | 200mM      | Life Technologies              | 35050-061              |                          |
| 2-mercaptoethanol                                                                                                               | 50µM                               | 50mM       | Life Technologies              | 31350-010              |                          |
| Pen/Strep                                                                                                                       | 50U/mL                             | 100x       | Life Technologies              | 17502-048              |                          |
| IL-34                                                                                                                           | 100ng/mL                           | 100ug/mL   | Peptotech                      | 200-34                 |                          |
| GM-CSF                                                                                                                          | 10ng/mL                            | 10ug/mL    | Life Technologies              | PHC2013                |                          |
| Growth-factor reduced Matrigel (undefined product for coating plate for co-pMG and pNeuron)                                     | 83-fold dilution of supplied stock |            | Scientific Laboratory Supplies | 354277                 |                          |
| <b>Neuronal maintenance medium (NMM)<br/>(for differentiation until start of co-culture and for pNeuron (Shi et al., 2012))</b> |                                    |            |                                |                        |                          |
|                                                                                                                                 | Final conc                         | Stock conc | Supplier                       | Cat no.                |                          |
| Neurobasal                                                                                                                      | 1x                                 | 1x         | Life Technologies              | 21103-049              |                          |
| Advanced DMEM/F12                                                                                                               | 1x                                 | 1x         | Life Technologies              | 12634-010              |                          |
| B27 supplement                                                                                                                  | 0.5x                               | 100x       | Life Technologies              | 17504-044              |                          |
| N2 supplement                                                                                                                   | 0.5x                               | 100x       | Life Technologies              | 17502-048              |                          |
| GlutaMAX™                                                                                                                       | 2mM                                | 200mM      | Life Technologies              | 35050-061              |                          |
| 2-mercaptoethanol                                                                                                               | 50µM                               | 50mM       | Life Technologies              | 31350-010              |                          |
| Pen/Strep                                                                                                                       | 50U/mL                             | 100x       | Life Technologies              | 17502-048              |                          |
| Insulin                                                                                                                         | 5ug/mL                             |            | Sigma                          | I6634                  |                          |
| Growth-factor reduced Matrigel (undefined product for coating plate)                                                            | 83-fold dilution of supplied stock |            | Scientific Laboratory Supplies | 354277                 |                          |
| <b>Macrophage differentiation medium (for pMac (van Wilgenburg et al., 2013))</b>                                               |                                    |            |                                |                        |                          |
|                                                                                                                                 | Final conc                         | Stock conc | Supplier                       | Cat no.                |                          |
| X-VIVO 15                                                                                                                       | 1x                                 | 1x         | Lonza                          | BE04-418               |                          |
| GlutaMAX™                                                                                                                       | 2mM                                | 200mM      | Life Technologies              | 35050-061              |                          |
| 2-mercaptoethanol                                                                                                               | 50µM                               | 50mM       | Life Technologies              | 31350-010              |                          |

|                                                                                                                       |                   |               |                                 |                                          |             |               |          |
|-----------------------------------------------------------------------------------------------------------------------|-------------------|---------------|---------------------------------|------------------------------------------|-------------|---------------|----------|
| Pen/Strep                                                                                                             | 50U/mL            | 100x          | Life Technologies               | 17502-048                                |             |               |          |
| M-CSF                                                                                                                 | 100ng/mL          | 100µg/mL      | Gibco                           | PHC 9501                                 |             |               |          |
| <b>Composition of N2 and B27 supplements</b><br>(*components that are potentially immunosuppressive / stress buffers) |                   |               |                                 |                                          |             |               |          |
| <b>N2 Supplement</b>                                                                                                  | Conc in 100x      |               | <b>B27 supplement</b>           | Conc in 50x                              |             |               |          |
| Human Transferrin (Holo)                                                                                              | 1mM               |               | DL Alpha Tocopherol Acetate     | Concentrations not given by manufacturer |             |               |          |
| Insulin Recombinant Full Chain*                                                                                       | 0.086mM           |               | DL Alpha-Tocopherol             |                                          |             |               |          |
| Progesterone*                                                                                                         | 0.002mM           |               | Vitamin A (acetate)             |                                          |             |               |          |
| Putrescine*                                                                                                           | 10mM              |               | BSA, fatty acid free Fraction V |                                          |             |               |          |
| Selenite                                                                                                              | 0.003mM           |               | Catalase*                       |                                          |             |               |          |
|                                                                                                                       |                   |               | Human Recombinant Insulin*      |                                          |             |               |          |
|                                                                                                                       |                   |               | Superoxide Dismutase*           |                                          |             |               |          |
|                                                                                                                       |                   |               | Corticosterone*                 |                                          |             |               |          |
|                                                                                                                       |                   |               | D-Galactose                     |                                          |             |               |          |
|                                                                                                                       |                   |               | Ethanolamine HCl                |                                          |             |               |          |
|                                                                                                                       |                   |               | Glutathione (reduced)           |                                          |             |               |          |
|                                                                                                                       |                   |               | L-Carnitine HCl                 |                                          |             |               |          |
|                                                                                                                       |                   |               | Linoleic Acid                   |                                          |             |               |          |
|                                                                                                                       |                   |               | Linolenic Acid                  |                                          |             |               |          |
|                                                                                                                       |                   |               | Progesterone*                   |                                          |             |               |          |
|                                                                                                                       |                   |               | Putrescine 2HCl*                |                                          |             |               |          |
|                                                                                                                       |                   |               | Sodium Selenite                 |                                          |             |               |          |
|                                                                                                                       |                   |               | T3 (triiodo-L-thyronine)        |                                          |             |               |          |
| <b>Antibodies used for Immunocytochemistry</b>                                                                        |                   |               |                                 |                                          |             |               |          |
| Primary                                                                                                               | Species/clonality | Manu-facturer | Cat. No.                        | Secondary                                | Fluorophore | Manu-facturer | Cat. No. |
| IBA1                                                                                                                  | goat/poly         | abcam         | ab5076                          | donkey-<br>αgoat                         | Alexa488    | Thermo Fisher | A11055   |
| TUJ1                                                                                                                  | mouse/mono        | Covance       | MMS-435P                        | donkey-<br>αmouse                        | Alexa647    | Thermo Fisher | A10042   |
| TUJ1                                                                                                                  | rabbit            | Covance       | MRB-435P                        | Donkey-<br>αrabbit                       | Alexa568    | Thermo Fisher | A31571   |
| GFAP                                                                                                                  | rabbit/poly       | DAKO          | ZO334                           | donkey-<br>αrabbit                       | Alexa568    | Thermo Fisher | A31571   |
| TBR1                                                                                                                  | rabbit/poly       | Abcam         | ab31940                         | donkey-<br>αrabbit                       | Alexa568    | Thermo Fisher | A31571   |
| SATB2                                                                                                                 | mouse/mono        | Abcam         | ab51502                         | donkey-<br>αmouse                        | Alexa647    | Thermo Fisher | A10042   |
| NESTIN                                                                                                                | mouse/mono        | Abcam         | ab22035                         | donkey-<br>αmouse                        | Alexa647    | Thermo Fisher | A10042   |

|                    |                     |                     |          |                       |          |                  |        |
|--------------------|---------------------|---------------------|----------|-----------------------|----------|------------------|--------|
| PAX6               | rabbit/<br>poly     | Covance             | PRB-278P | donkey-<br>αrabbit    | Alexa568 | Thermo<br>Fisher | A31571 |
| SYNAPTO-<br>PHYSIN | guinea<br>pig/ poly | Synaptic<br>Systems | 101 004  | goat-α-<br>guinea pig | Alexa488 | Thermo<br>Fisher | A11073 |
| PSD95              | mouse/<br>mono      | Thermo<br>Fisher    | MA1-045  | donkey-<br>αmouse     | Alexa647 | Thermo<br>Fisher | A10042 |
| Ki67               | mouse/<br>mono      | Merck<br>Millipore  | MAB4190  | donkey-<br>αmouse     | Alexa647 | Thermo<br>Fisher | A10042 |
| TMEM119            | rabbit/<br>poly     | abcam               | ab185333 | donkey-<br>αrabbit    | Alexa568 | Thermo<br>Fisher | A31571 |
| P2RY12             | rabbit/<br>mono     | abcam               | ab188968 | donkey-<br>αrabbit    | Alexa568 | Thermo<br>Fisher | A31571 |
| IgG                | rabbit/<br>poly     | abcam               | ab27478  | donkey-<br>αrabbit    | Alexa568 | Thermo<br>Fisher | A31571 |
| MERTK              | mouse/<br>mono      | abcam               | Ab52591  | donkey-<br>αmouse     | Alexa647 | Thermo<br>Fisher | A10042 |
| IgG1               | Mouse/<br>mono      | AbD<br>serotec      | MCA928   | donkey-<br>αmouse     | Alexa647 | Thermo<br>Fisher | A10042 |

**Fluorophore conjugated antibodies used for Flow Cytometry**

| Marker | Fluorophore | Isotype      | Manufacturer | Cat. No. marker | Cat. No.<br>isotype control |
|--------|-------------|--------------|--------------|-----------------|-----------------------------|
| CD11b  | APC         | mouse IgG1-K | Biolegend    | 301309          | 400119                      |
| CD11C  | FITC        | mouse IgG2a  | ImmunoTools  | 21487113        | 21335023                    |
| CD14   | PE          | mouse IgG1   | ImmunoTools  | 21620144        | 21335014                    |
| CD45   | APC         | mouse IgG1   | ImmunoTools  | 21270456        | 21275516                    |
| HLA-DR | FITC        | mouse IgG2a  | ImmunoTools  | 21278993        | 21335023                    |
| CX3CR1 | APC         | rat IgG2b-K  | Biolegend    | 341609          | 400611                      |
| CD33   | APC         | mouse IgG1   | eBioscience  | 17-0338-42      | 17-4717-41                  |
| MERTK  | Alexa647    | mouse IgG1-K | Biolegend    | 367606          | 400130                      |

**Primers used for qRT-PCR of microglia markers**

|         | Forward primer sequence:<br>(5' to 3') | Reverse primer sequence:<br>(5' to 3') | supplier      |
|---------|----------------------------------------|----------------------------------------|---------------|
| C1QA    | GTGACACATGCTCTAAGAAG                   | GACTCTTAAGCACTGGATTG                   | Sigma Aldrich |
| GAS6    | CGAAGAAACTCAAGAAGCAG                   | AGACCTTGATCTCCATTAGG                   | Sigma Aldrich |
| GPR34   | GAAGACAATGAGAAGTCATACC                 | TGTTGCTGAGAAGTTTGTG                    | Sigma Aldrich |
| PROS1   | AAAGATGTGGATGAATGCTC                   | TCACATTCAAAATCTCCTGG                   | Sigma Aldrich |
| MERTK   | AGGACTTCCTCACTTTACTAAG                 | TGAACCCAGAAAATGTTGAC                   | Sigma Aldrich |
| P2RY12  | AAGACTCAAGACTTTAC                      | GGGTTTGAATGTATCCAGTAAG                 | Sigma Aldrich |
| TMEM119 | AGTCCTGTACGCCAAGGAAC                   | GCAGCAACAGAAGGATGAGG                   | Sigma Aldrich |
| TREM2   | TCTGAGAGCTTCGAGGATGC                   | GGGGATTTCTCCTTCAAGA                    | Sigma Aldrich |
| 18S     | Sequences not provided by supplier     |                                        | Eurogentec    |

Table S2 Initial screen with Proteome Profiler™ Human XL Cytokine Array (Relates to Figure 7)

| Released factor                                                   | pMac unstim | pMac LPS/IFN $\gamma$ | co-pMG unstim | co-pMG LPS/IFN $\gamma$ |
|-------------------------------------------------------------------|-------------|-----------------------|---------------|-------------------------|
| Adiponectin                                                       | 2870        | 1970                  | 4640          | 2960                    |
| Aggrecan                                                          | 9375        | 7010                  | 7080          | 9105                    |
| <b>Angiogenin</b>                                                 | 21250       | 14100                 | 106500        | 65350                   |
| Angiopoietin-1                                                    | 2365        | 2540                  | 4475          | 5655                    |
| Angiopoietin-2                                                    | 4655        | 4095                  | 7020          | 8695                    |
| BAFF                                                              | 4385        | 3485                  | 4870          | 10725                   |
| BDNF                                                              | 3010        | 1510                  | 3855          | 4140                    |
| <b>C5/C5a</b>                                                     | 2420        | 12600                 | 4645          | 19300                   |
| CCL2 (MCP-1)                                                      | 116500      | 144500                | 148000        | 143500                  |
| <b>CCL3/4 (MIP-1<math>\alpha</math>/MIP-1<math>\beta</math>)*</b> | 3260        | 155500                | 3230          | 18200                   |
| <b>CCL5 (RANTES)*</b>                                             | 3120        | 115500                | 3930          | 4665                    |
| <b>CCL7 (MCP-3)*</b>                                              | 3975        | 48200                 | 6505          | 51700                   |
| CCL17 (SDF-1 $\alpha$ )                                           | 4525        | 6120                  | 9840          | 10320                   |
| CCL17 (TARC)                                                      | 3130        | 2035                  | 3255          | 3070                    |
| <b>CCL19 (MIP-3<math>\beta</math>)*</b>                           | 2435        | 14350                 | 2765          | 9790                    |
| <b>CCL20 (MIP-3<math>\alpha</math>)*</b>                          | 1760        | 99650                 | 2570          | 6895                    |
| <b>CD14</b>                                                       | 31450       | 24200                 | 46350         | 38900                   |
| CD40Ligand (CD154)                                                | 3425        | 2340                  | 4855          | 4795                    |
| Chitinase 3-like 1                                                | 250500      | 236000                | 229000        | 209000                  |
| Complement Factor D                                               | 16100       | 10940                 | 10130         | 13200                   |
| C-Reactive Protein                                                | 2665        | 5360                  | 5040          | 7775                    |
| Cripto-1                                                          | 2360        | 2320                  | 3510          | 3080                    |
| <b>CXCL1 (GRO-<math>\alpha</math>)*</b>                           | 3515        | 101900                | 62050         | 102100                  |
| CXCL4 (PF4)                                                       | 2045        | 162                   | 1895          | 2900                    |
| <b>CXCL5 (ENA-78)*</b>                                            | 2225        | 3960                  | 166000        | 102000                  |
| <b>CXCL9 (MIG)*</b>                                               | 2935        | 128000                | 3620          | 55100                   |
| <b>CXCL10 (IP-10)*</b>                                            | 3720        | 172500                | 3620          | 156500                  |
| <b>CXCL11 (I-TAC)*</b>                                            | 2970        | 231000                | 1825          | 119000                  |
| Cytostatin C                                                      | 35500       | 22950                 | 55400         | 34800                   |
| Dkk-1                                                             | 2475        | 3135                  | 2780          | 2675                    |
| DPPIV (CD26)                                                      | 21700       | 47700                 | 42050         | 16045                   |
| <b>EGF</b>                                                        | 3455        | 2880                  | 6240          | 6510                    |
| <b>EMMPRIN (CD147)</b>                                            | 12050       | 20800                 | 21000         | 4105                    |
| Endoglin (CD105)                                                  | 8365        | 8665                  | 9940          | 7470                    |
| <b>Fas Ligand (CD178)</b>                                         | 2970        | 1925                  | 3015          | 5575                    |
| <b>FGF basic</b>                                                  | 3850        | 9590                  | 6925          | 11950                   |
| <b>FGF-7</b>                                                      | 2275        | 966                   | 3385          | 5385                    |
| <b>FGF19</b>                                                      | 14900       | 24600                 | 24250         | 35250                   |
| <b>Flt-3 Ligand</b>                                               | 1915        | 1355                  | 3395          | 1520                    |
| <b>G-CSF</b>                                                      | 1330        | 4840                  | 2765          | 6175                    |
| GDF-15                                                            | 7325        | 10570                 | 6195          | 5790                    |
| <b>GM-CSF(spiked in co-pMG)</b>                                   | 4335        | 4860                  | 31950         | 13350                   |
| <b>Growth hormone</b>                                             | 1340        | 1340                  | 4215          | 1910                    |
| <b>HGF</b>                                                        | 2245        | 7675                  | 4780          | 7715                    |
| <b>ICAM-1 (CD54)</b>                                              | 10900       | 26600                 | 30950         | 38400                   |
| <b>IGFBP-2</b>                                                    | 2135        | 1147                  | 124500        | 91850                   |
| IGFBP-3                                                           | 3540        | 4555                  | 8625          | 7430                    |
| <b>IL-1-ra</b>                                                    | 15745       | 68350                 | 47400         | 25300                   |
| <b>IL-1<math>\alpha</math></b>                                    | 4585        | 4540                  | 6940          | 9825                    |
| IL-1 $\beta$ *                                                    | 3535        | 6535                  | 4740          | 5630                    |
| IL-2                                                              | 2995        | 3025                  | 4645          | 2610                    |
| IL-3                                                              | 1565        | 1102                  | 2335          | 1930                    |
| <b>IL-4</b>                                                       | 4970        | 8225                  | 7430          | 9435                    |
| IL-5                                                              | 2190        | 909                   | 2330          | 2055                    |

|                                             |        |        |        |        |
|---------------------------------------------|--------|--------|--------|--------|
| <b>IL-6*</b>                                | 4440   | 107500 | 6840   | 102000 |
| <b>IL-8 (CXCL8)*</b>                        | 63150  | 122000 | 149000 | 136000 |
| <b>IL-10*</b>                               | 4530   | 19900  | 7565   | 47850  |
| <b>IL-11</b>                                | 5835   | 7365   | 9115   | 10850  |
| <b>IL-12p70</b>                             | 2915   | 4310   | 4290   | 5660   |
| <b>IL-13</b>                                | 2135   | 2525   | 4410   | 6250   |
| <b>IL-15</b>                                | 2690   | 4040   | 3085   | 6725   |
| <b>IL-16</b>                                | 2145   | 2405   | 2715   | 5860   |
| <b>IL-17A</b>                               | 14600  | 33250  | 18700  | 28150  |
| <b>IL-18 Bpa*</b>                           | 2180   | 10600  | 3125   | 9030   |
| <b>IL-19</b>                                | 2635   | 2645   | 3145   | 39600  |
| IL-22                                       | 5120   | 9720   | 6410   | 8270   |
| <b>IL-23*</b>                               | 1830   | 13250  | 1468   | 5400   |
| IL-24                                       | 2355   | 4260   | 3705   | 4155   |
| IL-27                                       | 3760   | 9640   | 2390   | 5680   |
| IL-31                                       | 1770   | 2089   | 2735   | 2510   |
| IL-32 $\alpha/\beta/\gamma$                 | 2510   | 4625   | 2585   | 4175   |
| <b>IL-33</b>                                | 754    | 2125   | 2675   | 4035   |
| <b>IL-34 (spiked in co-pMG)</b>             | 2130   | 806    | 14100  | 3980   |
| INF $\gamma$ (spiked in LPS/IFN $\gamma$ )* | 8420   | 109000 | 8100   | 104500 |
| Kallikrein 3                                | 1695   | 2840   | 3860   | 1747   |
| Leptin                                      | 3430   | 2940   | 3275   | 4620   |
| LIF                                         | 2555   | 1565   | 1750   | 4270   |
| <b>Lipocalin-2</b>                          | 7785   | 8250   | 2320   | 3675   |
| <b>M-CSF (spiked in pMac)</b>               | 137500 | 133500 | 5250   | 10725  |
| <b>MIF*</b>                                 | 20550  | 11450  | 70800  | 72250  |
| <b>MMP-9</b>                                | 56950  | 55100  | 76150  | 19100  |
| Myeloperoxidase                             | 2530   | 322    | 1605   | 1641   |
| Osteopontin                                 | 107750 | 106000 | 111000 | 105750 |
| <b>PDGF-AA</b>                              | 9715   | 19200  | 5195   | 7080   |
| <b>PDGF-AB/BB</b>                           | 5615   | 4865   | 1200   | 1515   |
| <b>Pentraxin-3</b>                          | 5150   | 3310   | 12350  | 19050  |
| RAGE                                        | 2320   | 825    | 2880   | 3295   |
| <b>RBP4</b>                                 | 315500 | 355000 | 4180   | 4565   |
| Relaxin-2                                   | 2590   | 2070   | 1510   | 3035   |
| Resistin                                    | 5670   | 5420   | 7495   | 5515   |
| <b>Serpine1 (PAI-1)*</b>                    | 4630   | 12000  | 104000 | 87350  |
| SHBG                                        | 3675   | 4675   | 5120   | 4790   |
| ST2                                         | 2680   | 1930   | 2255   | 3760   |
| TFF3                                        | 5340   | 3845   | 2950   | 3865   |
| TfR (CD71)                                  | 3380   | 2025   | 3970   | 4475   |
| TGF- $\alpha$                               | 2865   | 2230   | 3735   | 3980   |
| <b>TNFRSF8 (CD30)*</b>                      | 2445   | 645    | 4800   | 2090   |
| <b>TNF-<math>\alpha</math>*</b>             | 3645   | 103500 | 1960   | 8195   |
| Thrombospondin-1                            | 1455   | -130   | 2950   | 769    |
| <b>uPAR (CD87)</b>                          | 6895   | 51050  | 14250  | 6130   |
| <b>VEGF*</b>                                | 1590   | 147    | 36350  | 3315   |
| Vitamin D BP                                | 8660   | 10600  | 6240   | 7865   |

Legend Table S2

Results were quantified with Image Studio Lite. Numbers show the mean luminescence signal of two dots per factor (n=2). Factors that are substantially differentially released between pMac and co-pMG or upon stimulation with LPS/IFN $\gamma$  are in bold font. Negative values are where measurement is below background luminescence. \* are followed up in Figure 7.

Legend Table S3 Transcriptomics data and differential expression results

The Excel file contains the normalised probe level expression data and the full results of the differential expression analyses presented in Supplementary Figure S3. Further details of these analyses are given in the Supplementary Experimental Procedures.

## Supplemental Experimental Procedures

### iPSC lines

The derivation and characterisation of the iPSC lines used in this study is described elsewhere (Fernandes et al., 2016; Sandor et al., 2017) Haenseler, submitted, Melguzo in preparation), see Table S1. All lines were derived from dermal fibroblasts from disease-free donors recruited through StemBANCC (SF180, SF856) (Morrison et al., 2015), or the Oxford Parkinson's Disease Centre (SF840, AH016): participants were recruited to this study having given signed informed consent, which included derivation of hiPSC lines from skin biopsies (Ethics Committee: National Health Service, Health Research Authority, NRES Committee South Central, Berkshire, UK, who specifically approved this part of the study (REC 10/H0505/71), or from fibroblasts purchased from Lonza (SBAD3, SBAD4), who provide the following ethics statement: 'These cells were isolated from donated human tissue after obtaining permission for their use in research applications by informed consent or legal authorization.' iPSC were cultured in mTeSR<sup>TM</sup>1 (StemCell Technologies), on hESC-qualified Matrigel-coated plates (BD), passaging as clumps using 0.5 mM EDTA in PBS (Beers et al., 2012). Large-scale SNP-QCed batches were frozen at p15-25 and used for experiments within a minimal number of passages post-thaw to ensure consistency.

### Generation and characterisation of the RFP expressing iPSC line AH016-3 Lenti\_IP\_RFP

To generate an iPSC line constitutively expressing RFP, AH016-3 was transduced with a second generation SIN lentiviral vector (LV-EF1a-RFP-IRES-Puromycin<sup>R</sup>). Cells were kept under continuous puromycin selection (2 µg/mL: a concentration sufficient to kill untransduced cells). For single cell cloning AH016-3-RFP were plated at 10<sup>4</sup> per 10 cm dish on mitotically-inactivated mouse embryonic fibroblast feeder cells (MEF; outbred Swiss mice established and maintained at the Department of Pathology, Oxford (Chia, Achilli, Festing, & Fisher, 2005; Gardner, 1982)) on gelatin-coated tissue culture plates in hESC medium (KO-DMEM, 2 mmol/L GlutaMAX 100 mmol/L non-essential amino acids, 20% serum replacement (KO-SR), and 8 ng/mL basic fibroblastic growth factor (FGF2)), supplemented with 10 µmol/L Y-27632 on the day of the plating. After 7 days of expansion, individual single-cell colonies were picked manually onto a matrigel coated 96 well plate in mTeSR<sup>TM</sup>1. Number of lentiviral integrants per clone was quantified using digital droplet PCR (ddPCR) copy number variation analysis (Bio-Rad QX200) according to manufacturer's protocol. Briefly, 2 µl of EcoRI-digested genomic DNA at 100 ng/µl was used with the EvaGreen Super Mix and 100 nM forward and reverse primers. The following RFP primers were used: JB-111 (5' - ATGCAGAAGAAAACACGCGG - 3') and JB-112 (5' - CCGGGCATCTTGAGGTTCTT - 3'). PCR primers for the *MYB* gene, were used as endogenous control: JB-71 (5' - ACAGGAAGGTTATCTGCAGGAGTCT - 3') and JB-72 (5' - AGTGGCAGGGAGTTGAGCTGTA - 3'). The iPSC clone used in this study has 11 lentiviral integrants.

## Immunofluorescence

Cells were fixed with 4% paraformaldehyde (PFA) in PBS for 10 min, permeabilised with 0.3% Triton X-100 in PBS and blocked with 10% normal donkey serum (Sigma) for 1 hr, then incubated with primary antibodies in PBS, 5% normal donkey serum and 0.1% Triton X-100 overnight, washed 3 times with PBS and 0.3% Triton X-100, incubated with secondary antibodies in PBS 0.1% Triton X-100 and 5% normal donkey serum for 90 min, washed 3 times with PBS and 0.3% Triton X-100, stained with DAPI, washed once with PBS, overlaid with PBS and imaged with an EVOS fl auto microscope (AMG), FV1200 (Olympus) confocal microscope, OperaPhenix (PerkinElmer) or an IN Cell Analyzer 6000 (GE).

The antibodies used are listed in Table S3.

## Transcriptome sample preparation and analysis

30 mL of peripheral blood was collected from 3 healthy adult volunteers, according to University of Oxford OHS policy document 1/03, with signed informed consent. PBMCs were isolated after density gradient centrifugation with Ficol-Paque PLUS (17-1440-03, GE Healthcare), and monocytes (bloodMono) were extracted with CD14 MACS beads (130-050-201, Miltenyi). iPSC-derived macrophage precursors (pMacpre), from 3 control lines, were collected and immediately lysed for RNA isolation. From the same harvest, cells were set up in macrophage differentiation medium for 2 weeks to obtain pMac, and in microglia medium to obtain pMGL (lysed directly in the well after 2 weeks to obtain RNA), or resuspended in microglia medium, added to SBAD3-01 neurons and differentiated to co-pMG for 2 weeks. Then co-culture was dissociated to a single cell suspension with StemPro accutase (StemCell technologies), and any remaining adherent microglia gently lifted with a cell scraper. Cells were passed through a 70  $\mu$ m cell strainer (352350, BD Bioscience), then co-pMG were selected from the co-culture with CD11b MACS beads (130-093-634, Miltenyi Biotec) and lysed immediately for RNA isolation. RNA was extracted from lysates using an RNeasy kit (Qiagen) for Illumina HT12v4 transcriptome array analysis. For qPCR, additional samples were blood monocyte-derived macrophages (bloodMac), which were differentiated on tissue-culture-treated plates, for 1 week in macrophage medium and compared directly to the same donors' bloodMono (lysed straight after CD14 bead selection) and to pMac differentiated for 1 week.

RNA from human microglia was obtained from 3 individual human fetal samples (at pre-myelinating gestational ages of fetalMG\_1 20, fetalMG\_2 23, fetalMG\_3\_15 weeks) and one human adult sample, according to Durafourt et al. (Durafourt et al., 2013). Briefly, microglia were cultured *ex vivo* in DMEM supplemented with 5% FBS for 5-7 days prior to RNA isolation using standard Trizol<sup>TM</sup> methods. All procedures related to the use of these cells followed established institutional (McGill University, Montreal, QC, Canada) and Canadian Institutes of Health Research guidelines for the use of human cells. A further sample of adult microglia RNA was also obtained from directly isolated human surgical brain material (age 51; UK: Re: An Investigation of Novel Proteins and Biomarkers in Surgically-Resected Tissue from Patients with Epilepsy. R&D Ref: 10815; REC Ref: 14/EE/1098; IRAS No: 144065). Brain material was papain-treated to obtain single cells, then panned with CD11b MACS beads and the positive population lysed immediately for RNA extraction, within 4 hours of surgical removal.

Microarray data were pre-processed with the Bioconductor beadarray package (Dunning et al., 2007) using the "neqc" method to normalise expression levels within and between samples. Annotations were sourced from the Bioconductor illuminaHumanv4.db package: probes with an assigned quality of "No match" were excluded from down-stream analysis. Following inspection of the data only the top two-thirds of probes (by maximum expression level) were retained for further analysis being considered to represent "expressed genes". PCA analysis of the normalised, scaled expression matrix was performed using the R "prcomp" function. Differential expression analysis was performed using the Limma Bioconductor package (Ritchie et al., 2015). The Benjamini-Hochberg (BH) multiple testing correction procedure was used to compute adjusted p-values.

K-means clustering analysis of gene expression in pMac, pMGL and co-pMG was based on a set of 1734 probes with high ( $\geq 1000$  in at least 2 replicates) and significantly variable (overall F-test, Limma, BH adjusted p value  $< 0.05$ ) expression in these samples. K-means clustering was performed on the matrix of mean-scaled gene expression levels (replicate samples first combined by median averaging) using the R "kmeans" function (nstarts=10000, iter.max=10000). Selection of cluster number was guided by scree-plot analysis of within-cluster sum of squares (not shown). The Bioconductor GOSTats package (Falcon and Gentleman, 2007) was used to identify significantly over-enriched GO biological processes within each cluster (conditional test, p-value cutoff 0.01, gene universe comprised of the top two-thirds "expressed genes", adjusted p-value  $< 0.05$ ).

RNA-seq data for human astrocytes, endothelial cells myeloid cells, neurons and oligodendrocytes (Zhang et al., 2016) was retrieved from GEO (GSE73721). Per-gene expression levels (upper-quartile normalised TPMs) were quantitated using Salmon (Patro et al., 2017) with a quasi index (31bp k-mers) built from human coding sequences (Ensembl version 84 hg38 annotations). Gene expression levels for the RNA-seq and microarray data were merged, subject to a robust quantile normalisation (R package "preprocessCore", weighted to be informed only the RNA-seq samples) and  $\log_2(n+1)$  transformed. Non-negative matrix factorisation was applied to the values from the Zhang, et. al. samples (filtered to exclude genes below the 25<sup>th</sup> expression quantile). Five meta-genes were identified using the R package "NNLM" (method="scd", rel.tol=-1, max.iter=100K, loss="mkl"). Samples were hierarchically clustered by meta-gene expression level (manhattan distance, complete agglomeration), the R package "pvclust" was used to calculate approximately unbiased p-values for the clusters (nboot=100K) and leaf order was optimised using the R package "cba".

### **Reverse transcription and qRT PCR**

RNA was reverse transcribed using High-Capacity RNA-to-cDNA™ Kit (Thermo Fisher). Quantitative real time PCR was performed with *Power SYBR® Green PCR Master Mix* (Thermo Fisher) on a StepOnePlus™ Real-Time PCR System. Primers used are listed in Table S5.

### **Flow cytometry**

Co-pMG were isolated with CD11b magnetic beads (MACS®, Miltenyi Biotec) as described for the transcriptome sample preparation. Pilot experiments to detach macrophages from the tissue culture plate with accutase, in direct comparison with our previous protocol of cold 5 mM EDTA/12 mM Lidocaine (Carter et al., 2009), showed no substantive difference in surface marker levels, so accutase was used as it lifts the cells much more rapidly, thereby minimising cellular change/damage. Where relevant, macrophages were also subjected to CD11b bead treatment. Freshly harvested macrophage precursors were stained directly, after passage through a 40  $\mu$ M cell strainer (BD Bioscience). The antibodies used are listed in Table S4. Isotype control antibodies used were from the same company with the same fluorophore at the same concentration (van Wilgenburg et al., 2013).

### **Live imaging**

AH016-3 Lenti-IP-RFP-microglia were co-cultured with SFC840-03-01 cortical neurons in matrigel-coated 96-well black/clear bottom plates (Costar, 3603). RFP signal was used to visualize microglia in co-culture. Images of RFP signal and phase were taken every 5 minutes for 5 hours (2 videos/well). Microglial movement was manually tracked with ImageJ and tracks were analysed with Chemotaxis and Migration Tool Version 2.0 (Ibidi). Microglia positions were determined by marking all microglia with Image J. Manual counting and distance to next neighbour was calculated from this data with R. To check for proinflammatory microglial morphology, co-cultures were treated with 100 ng/mL LPS imaged every 5 minutes for 17 hr respectively 20 hr. To visualise phagocytic activity, pHrodo Green zymosan yeast bioparticles (ThermoFisher, P35365) were added at 50  $\mu$ g/mL. pHrodo dyes fluoresce at low pH, ie, as the phagosome is progressively acidified after uptake of the particle in microglia (Kapellos et al., 2016). Wells were imaged every 10 minutes for 5 hours.

Calcium imaging was performed with Fluo-4 Direct™ Calcium assay kit (Thermo Fisher). Cells were cultured in 100  $\mu$ l microglia medium, 100  $\mu$ l of assay reagent was added to the medium and cells were incubated for 1 hr at 37°C. All medium was then removed and replaced with 200  $\mu$ l Tyrode's solution supplemented with 6 mM potassium to activate the neurons. Neurons were then imaged every 3 seconds for 2 minutes. Live imaging was performed with an EVOS™ FL Auto imaging system (Thermo Fisher) with a humidified onstage incubator set to 37°C, 5% CO<sub>2</sub>.

### **Cytokine/chemokine release measurements**

Proteome profilerXL (R&D systems) was used to identify candidate cytokines that are upregulated upon stimulation or differentially expressed/released between standard iPSC-derived macrophages and co-culture microglia. SFC180-01-01 pMac, or SFC180-01-01 co-pMG in co-culture with SBAD4-01 pNeurons, were



stimulated, after 3 weeks of culture, for 18 hours with 100 ng/mL LPS and 100 ng/mL IFN $\gamma$ . Supernatant was then collected and applied to the proteome profiler membranes according to manufacturer's instructions. Luminescence was captured with a GeneSnap Gel documentation system (SynGene) and signal was quantified with Image Studio Lite Version 5.2 (LI-COR).

22 cytokine/chemokine targets were assayed with a ProcartaPlex<sup>TM</sup> Custom Panel (eBioscience). pNeuron were co-cultured for 2 weeks with 3 different co-pMG, meanwhile iMac from the same lines were cultured in parallel monocultures in either macrophage medium or as pMGL in microglia medium, in a 96 well plate. Cells were then stimulated with 100 ng/mL LPS and 100 ng/mL IFN $\gamma$  or with medium only for 18 hr, supernatant was collected, centrifuged and analysed with multiplex beads, according to manufacturer's instructions, with a Luminex 100 Bio-Plex system (BioRad).

### Supplemental References

- Beers, J., Gulbranson, D., George, N., Siniscalchi, L., Jones, J., Thomson, J., and Chen, G. (2012). Passaging and colony expansion of human pluripotent stem cells by enzyme-free dissociation in chemically defined culture conditions. *Nat Protocols* 7, 2029-2040.
- Carter, G., Bernstone, L., Sangani, D., Bee, J., Harder, T., and James, W. (2009). HIV entry in macrophages is dependent on intact lipid rafts. *Virology* 386, 192-202.
- Dunning, M., Smith, M., Ritchie, M., and Tavaré, S. (2007). beadarray: R classes and methods for Illumina bead-based data. *Bioinformatics (Oxford, England)* 23, 2183-2184.
- Durafourt, B., Moore, C., Blain, M., and Antel, J. (2013). Isolating, culturing, and polarizing primary human adult and fetal microglia. *Methods in molecular biology (Clifton, NJ)* 1041, 199-211.
- Etemad, S., Zamin, R.M., Ruitenber, M., and Filgueira, L. (2012). A novel in vitro human microglia model: Characterization of human monocyte-derived microglia. *Journal of neuroscience methods* 209, 79-89.
- Falcon, S., and Gentleman, R. (2007). Using GOstats to test gene lists for GO term association. *Bioinformatics (Oxford, England)* 23, 257-258.
- Fernandes, H.J., Hartfield, E.M., Christian, H.C., Emmanouilidou, E., Zheng, Y., Booth, H., Bogetofte, H., Lang, C., Ryan, B.J., Sardi, S.P., *et al.* (2016). ER Stress and Autophagic Perturbations Lead to Elevated Extracellular alpha-Synuclein in GBA-N370S Parkinson's iPSC-Derived Dopamine Neurons. *Stem cell reports* 6, 342-356.
- Kapellos, T., Taylor, L., Lee, H., Cowley, S., James, W., Iqbal, A., and Greaves, D. (2016). A novel real time imaging platform to quantify macrophage phagocytosis. *Biochemical pharmacology* 116, 107-119.
- Morrison, M., Klein, C., Clemann, N., Collier, D.A., Hardy, J., Heisserer, B., Cader, M.Z., Graf, M., and Kaye, J. (2015). StemBANCC: Governing Access to Material and Data in a Large Stem Cell Research Consortium. *Stem cell reviews* 11, 681-687.
- Patro, R., Duggal, G., Love, M., Irizarry, R., and Kingsford, C. (2017). Salmon provides fast and bias-aware quantification of transcript expression. *Nature methods*.
- Ritchie, M., Phipson, B., Wu, D., Hu, Y., Law, C., Shi, W., and Smyth, G. (2015). limma powers differential expression analyses for RNA-sequencing and microarray studies. *Nucleic acids research* 43, gkv007-e047.
- Sandor, C., Robertson, P., Lang, C., Heger, A., Booth, H., Vowles, J., Witty, L., Bowden, R., Hu, M., Cowley, S., *et al.* (2017). Transcriptomic profiling of purified patient-derived dopamine neurons identifies convergent perturbations and therapeutics for Parkinson's disease. *Human molecular genetics*.
- Shi, Y., Kirwan, P., and Livesey, F.J. (2012). Directed differentiation of human pluripotent stem cells to cerebral cortex neurons and neural networks. *Nature protocols* 7, 1836-1846.
- van Wilgenburg, B., Browne, C., Vowles, J., and Cowley, S. (2013). Efficient, long term production of monocyte-derived macrophages from human pluripotent stem cells under partly-defined and fully-defined conditions. *PLoS one* 8, e71098.
- Zhang, Y., Sloan, S., Clarke, L., Caneda, C., Plaza, C., Blumenthal, P., Vogel, H., Steinberg, G., Edwards, M., Li, G., *et al.* (2016). Purification and Characterization of Progenitor and Mature Human Astrocytes Reveals Transcriptional and Functional Differences with Mouse. *Neuron* 89, 37-53.
